# Supplementary material for: Deep-Sea Epibenthic Megafaunal Assemblages of the Falkland Islands, Southwest Atlantic
Source: MDPI journal article supplement (doi:10.3390/d14080637), 2022-08-10
Supplement: s1 [file s1]

# Supplementary Materials

Table S1. Proposed drop-down camera stations in decimal degrees (°) from three environmental baseline surveys conducted by Nobel Energy in 2014. (Falkland Islands Government Department of Mineral Resources, unpublished data). All images were reviewed with those of low visibility or where both lasers could not be seen removed. Multivariate analysis was performed on the remaining sample images taken at 60-second intervals where more than three taxa were observed.

| Camera station | Longitude (°) | Latitude (°) | Depth (m) | Images reviewed | Number of images used in multivariate analysis |
|----------------|---------------|--------------|-----------|-----------------|------------------------------------------------|
| A_03_ENV       | -56.516       | -52.399      | 1134      | 10              | 1                                              |
| A_09_ENV       | -55.983       | -52.270      | 1260      | 5               | 1                                              |
| A_10_ENV       | -55.980       | -52.236      | 1261      | 4               | 3                                              |
| A_1008_ENV     | -55.833       | -52.259      | 1280      | 13              | 11                                             |
| A_1011_ENV     | -55.836       | -52.159      | 1325      | 7               | 0                                              |
| A_1013_ENV     | -55.748       | -52.234      | 1350      | 12              | 7                                              |
| A_1015_ENV     | -55.799       | -52.290      | 1358      | 9               | 0                                              |
| A_14_ENV       | -55.853       | -52.325      | 1316      | 4               | 3                                              |
| A_18_ENV       | -56.049       | -52.521      | 1415      | 7               | 4                                              |
| A_201_ENV      | -56.567       | -52.240      | 1120      | 15              | 13                                             |
| A_202_ENV      | -56.285       | -52.147      | 1153      | 12              | 0                                              |
| A_203_ENV      | -55.784       | -52.282      | 1321      | 3               | 3                                              |
| A_206_ENV      | -55.911       | -52.609      | 1530      | 4               | 3                                              |
| A_207_ENV      | -55.806       | -52.188      | 1247      | 7               | 6                                              |
| A_208_ENV      | -56.010       | -52.028      | 1200      | 4               | 4                                              |
| A_21_ENV       | -55.624       | -52.311      | 1420      | 6               | 4                                              |
| A_22_ENV       | -56.040       | -52.613      | 1522      | 6               | 4                                              |
| A_26_ENV       | -55.846       | -52.211      | 1260      | 8               | 8                                              |
| A_27_ENV       | -55.725       | -52.148      | 1260      | 13              | 6                                              |
| A_301_ENV      | -55.749       | -52.139      | 1250      | 10              | 8                                              |
| A_3010_ENV     | -55.959       | -52.612      | 1540      | 6               | 2                                              |
| A_302_ENV      | -55.544       | -52.171      | 1330      | 6               | 5                                              |
| A_303_ENV      | -55.670       | -52.164      | 1285      | 5               | 2                                              |
| A_304_ENV      | -55.864       | -52.087      | 1250      | 9               | 3                                              |
| A_305_ENV      | -55.933       | -52.182      | 1267      | 10              | 1                                              |
| A_306_ENV      | -55.654       | -52.213      | 1350      | 8               | 6                                              |
| A_307_ENV      | -55.690       | -52.379      | 1400      | 8               | 7                                              |
| A_308_ENV      | -55.826       | -52.345      | 1380      | 6               | 5                                              |
| A_309_ENV      | -55.728       | -52.331      | 1395      | 3               | 0                                              |
| N_07_ENV       | -54.872       | -50.499      | 1327      | 9               | 0                                              |
| N_1_ENV_GEO    | -54.429       | -50.570      | 1428      | 8               | 0                                              |
| N_10_ENV       | -54.390       | -51.006      | 1543      | 32              | 5                                              |
| N_10_GEO_ENV   | -53.548       | -50.326      | 1840      | 30              | 7                                              |
| N_107_GEO_ENV  | -54.681       | -50.891      | 1400      | 33              | 2                                              |
| N_11_ENV_GEO   | -54.332       | -51.158      | 1595      | 47              | 6                                              |
| N_2_ENV_GEO    | -54.253       | -50.630      | 1540      | 34              | 6                                              |
| N_2_GEO_ENV    | -54.601       | -50.609      | 1430      | 15              | 3                                              |
| N_3_ENV        | -54.284       | -51.102      | 1575      | 11              | 0                                              |
| N_3_GEO_ENV    | -54.580       | -50.517      | 1357      | 12              | 10                                             |
| N_4_ENV_GEO    | -54.239       | -50.826      | 1540      | 19              | 13                                             |
| N_4_GEO_ENV    | -54.779       | -50.404      | 1380      | 7               | 5                                              |
| N_5_ENV_GEO    | -54.501       | -50.436      | 1430      | 14              | 9                                              |

|             |         |         |      |     |     |
|-------------|---------|---------|------|-----|-----|
| N_5_GEO_ENV | -54.547 | -50.454 | 1390 | 23  | 12  |
| N_6_ENV     | -54.846 | -50.864 | 1320 | 23  | 6   |
| N_6_GEO_ENV | -54.389 | -50.459 | 1470 | 16  | 11  |
| N_7_ENV     | -54.872 | -50.499 | 1327 | 9   | 5   |
| N_8_ENV     | -54.020 | -50.566 | 1702 | 17  | 1   |
| N_9_ENV     | -54.531 | -50.859 | 1406 | 8   | 4   |
| T_003_ENV   | -59.130 | -53.581 | 1875 | 9   | 1   |
| T_06_ENV    | -59.331 | -53.636 | 1635 | 9   | 0   |
| T_08_ENV    | -59.240 | -53.701 | 1574 | 11  | 9   |
| T_08_GEO    | -59.192 | -53.697 | 1645 | 12  | 4   |
| T_09_ENV    | -59.423 | -53.748 | 1146 | 10  | 7   |
| T_10_ENV    | -59.035 | -53.714 | 1330 | 8   | 5   |
| T_10_GEO    | -59.324 | -53.714 | 1450 | 19  | 9   |
| T_11_ENV    | -59.061 | -53.589 | 1880 | 14  | 1   |
| T_13_GEO    | -60.131 | -53.493 | 1070 | 34  | 6   |
| T_13_GEO_B  | -60.131 | -53.493 | 1070 | 18  | 5   |
| T_13_GEO_C  | -60.129 | -53.493 | 1070 | 20  | 4   |
| T_14_GEO    | -59.914 | -53.462 | 1225 | 11  | 4   |
| T_14_GEO_B  | -59.909 | -53.462 | 1220 | 8   | 3   |
| T_14_GEO_C  | -59.913 | -53.462 | 1225 | 22  | 4   |
| T_201_ENV   | -59.176 | -53.575 | 1845 | 10  | 0   |
| T_202_ENV   | -59.154 | -53.588 | 1811 | 11  | 0   |
| T_204_ENV   | -59.122 | -53.516 | 1830 | 14  | 0   |
| T_301_ENV   | -59.367 | -53.549 | 1701 | 13  | 1   |
| T_302_ENV   | -59.409 | -53.550 | 1675 | 10  | 0   |
| T_304_ENV   | -59.277 | -53.524 | 1753 | 7   | 0   |
| T_306_ENV   | -59.110 | -53.593 | 1684 | 5   | 0   |
| Total       |         |         |      | 862 | 288 |

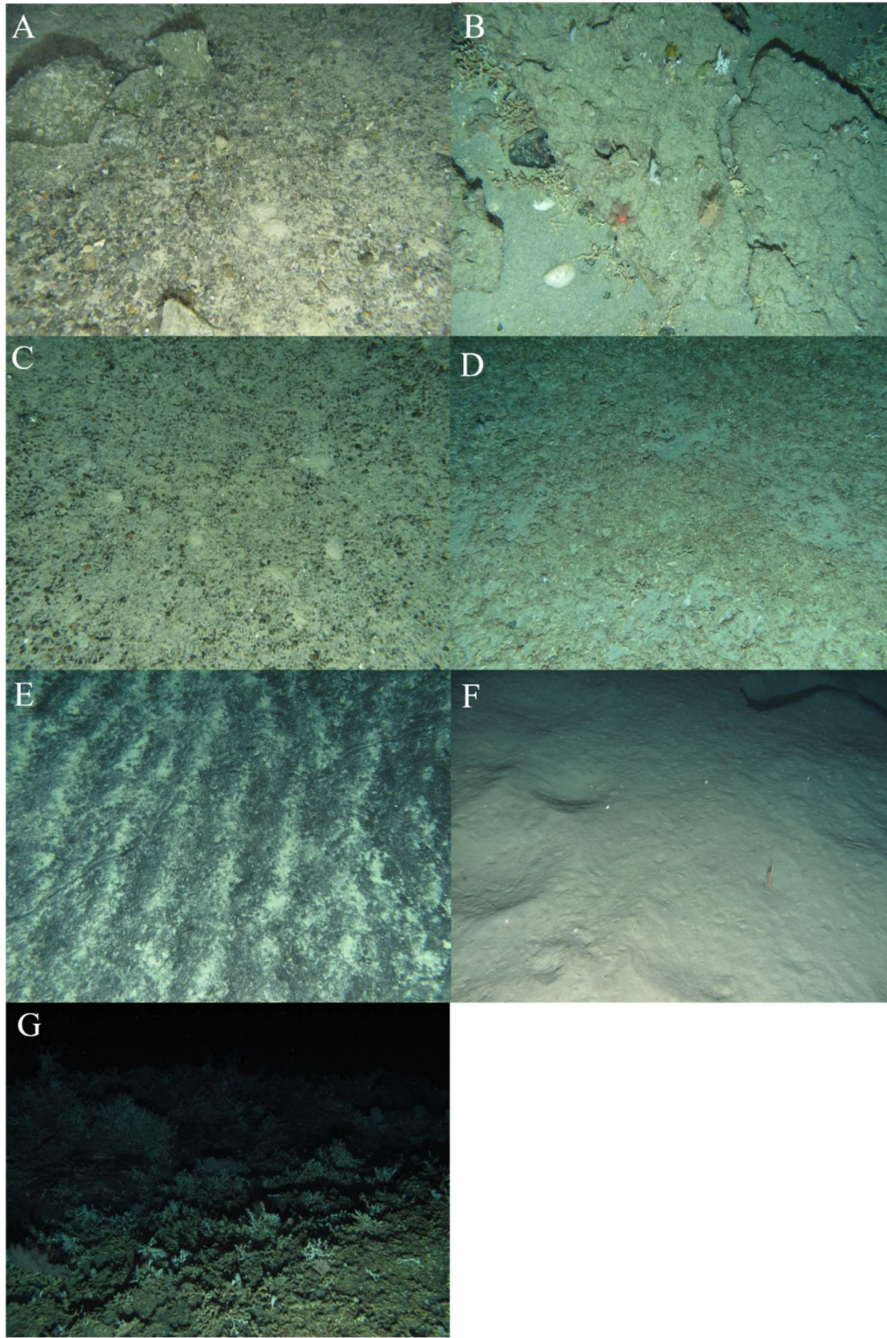

Figure S1. Example images of substratum type based on the EUNIS Marine Habitat Classification (<https://www.eea.europa.eu/data-and-maps/data/eunis-habitat-classification-1>). (A) Mixed substratum EUNIS code A6.2 observed from location N-2-GEO-ENV. (B) Hard substratum EUNIS code A6.1 observed from location N-6-GEO-ENV. (C) Coarse substratum EUNIS code A5.15 observed from location N-4-ENV-GEO. (D) Biogenic gravel (annotated as a subtype of mixed substratum) EUNIS code A6.2 observed from location N-4-ENV-GEO. (E) Muddy sand EUNIS code A6.4 observed from location N-3-ENV. (F) Mud EUNIS code A6.5 observed from location T-003-ENV. (G) Biogenic reef (adapted from EUNIS Communities of deep-sea corals that refers to reefs of *Desmophyllum pertusum*) code A6.61 observed at location A-1008-ENV.

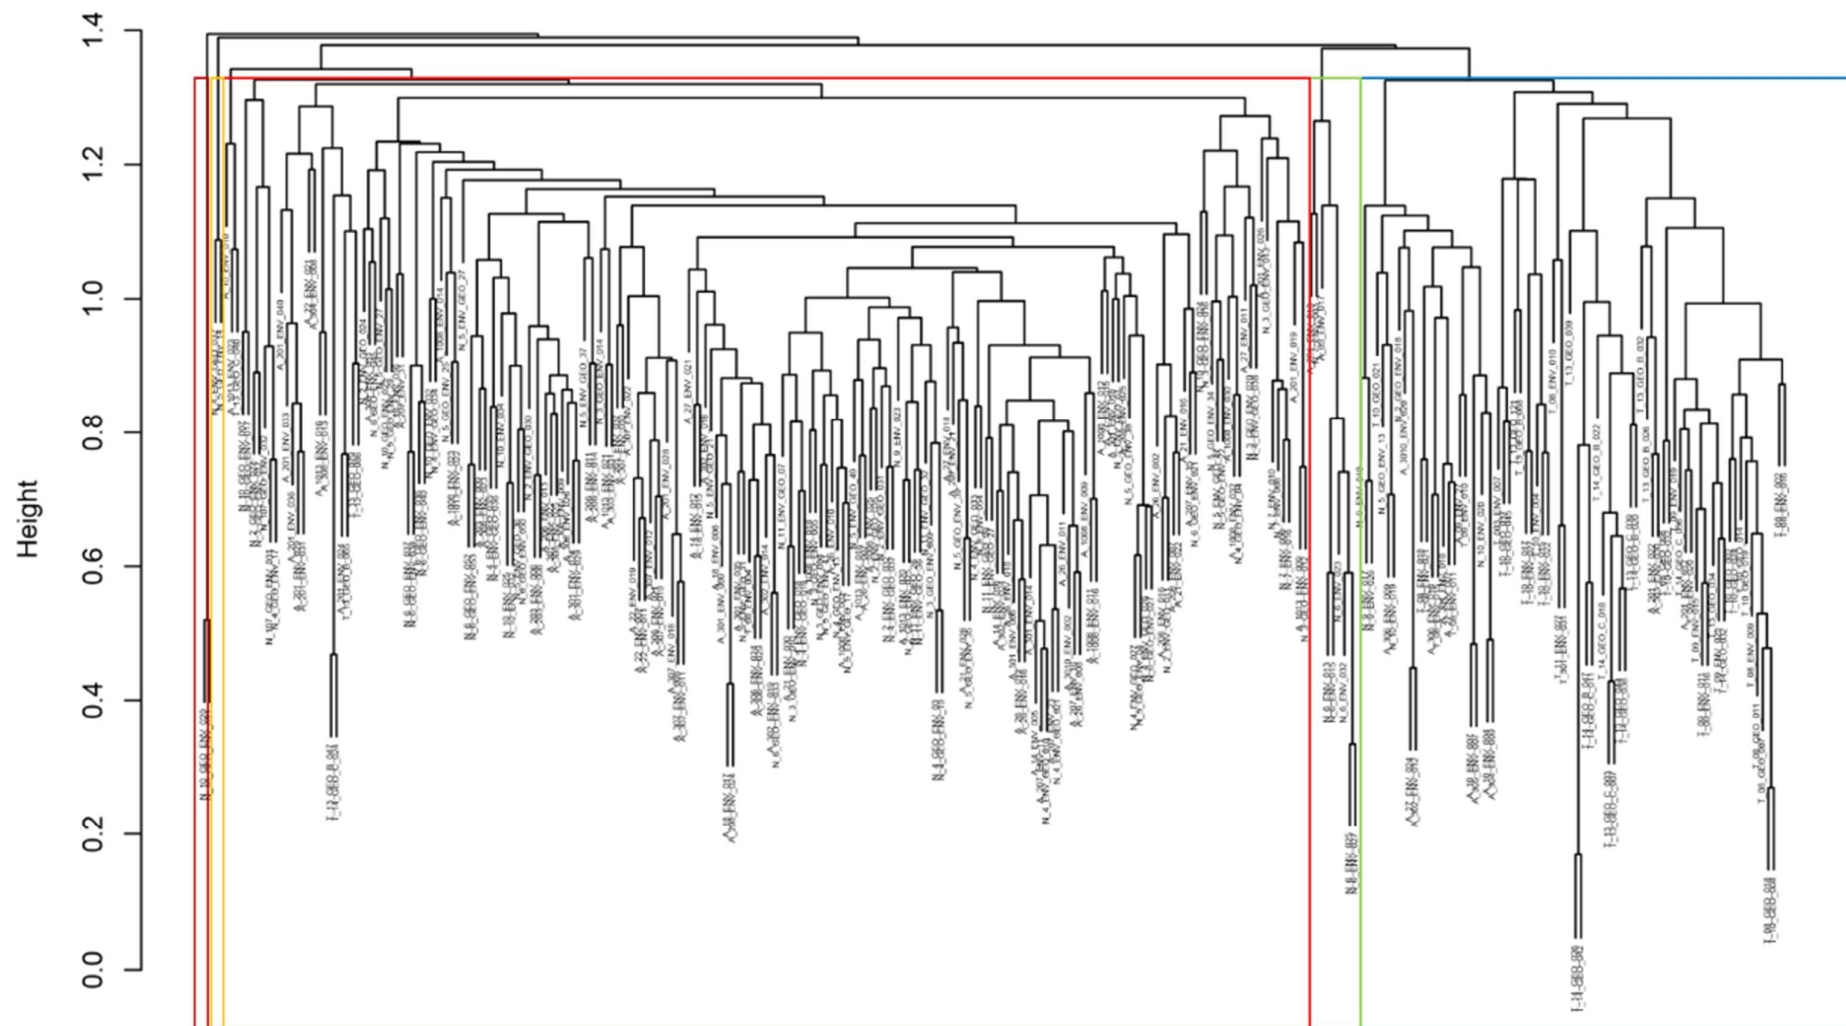

Figure S2. Hierarchical cluster analysis of Hellinger distance matrix of transformed morphospecies density data. Cluster membership is shown by the coloured rectangles. Cluster 1 = red, 2 = blue, 3 = green, 4 = orange, 5 = brown.

Table S2. Annotated morphospecies belonging to each cluster after hierarchal cluster analysis of 288 sample images. Mean density (m<sup>2</sup>) of each morphospecies within each cluster, total annotated and percent occurrence across images is provided for each morphospecies.

| Morphospecies                   | Mean density (m <sup>2</sup> ) of morphospecies within each cluster |      |      |      |      | Total annotated | Percentage occurrence across images |
|---------------------------------|---------------------------------------------------------------------|------|------|------|------|-----------------|-------------------------------------|
|                                 | 1                                                                   | 2    | 3    | 4    | 5    |                 |                                     |
| Actiniaria sp                   | 0.03                                                                | 0.03 | 0.00 | 0.52 | 0.00 | 17              | 3.1                                 |
| Actiniaria sp.2                 | 0.12                                                                | 0.11 | 0.00 | 0.00 | 0.00 | 16              | 3.4                                 |
| Actiniaria sp.6                 | 0.01                                                                | 0.00 | 0.00 | 0.00 | 0.00 | 11              | 1.4                                 |
| Actiniaria sp.7                 | 0.01                                                                | 0.10 | 0.00 | 0.00 | 0.00 | 8               | 2.1                                 |
| Alcyonacea sp.10                | 0.03                                                                | 0.00 | 0.00 | 0.00 | 0.00 | 13              | 2.1                                 |
| Alcyonacea sp.19                | 0.00                                                                | 0.00 | 0.00 | 7.51 | 0.00 | 27              | 0.7                                 |
| Alcyonacea sp.2                 | 0.08                                                                | 0.00 | 0.00 | 0.00 | 0.00 | 39              | 4.5                                 |
| Alcyonacea sp.20                | 0.01                                                                | 0.00 | 0.00 | 0.00 | 0.00 | 3               | 1                                   |
| Alcyonacea sp.22                | 0.03                                                                | 0.00 | 0.00 | 0.00 | 0.00 | 5               | 1                                   |
| Alcyonacea sp.23                | 0.04                                                                | 0.01 | 0.00 | 0.00 | 0.00 | 3               | 1                                   |
| Alcyonacea sp.24                | 0.00                                                                | 0.06 | 0.00 | 0.00 | 0.00 | 5               | 1.4                                 |
| Alcyonacea sp.3                 | 0.03                                                                | 0.00 | 0.00 | 0.00 | 0.00 | 6               | 1.4                                 |
| Alcyonacea sp.4                 | 0.02                                                                | 0.02 | 0.00 | 0.00 | 0.00 | 19              | 2.1                                 |
| Alcyonacea sp.5                 | 0.28                                                                | 1.67 | 0.11 | 0.00 | 0.00 | 206             | 15.4                                |
| Alcyonacea spp                  | 0.31                                                                | 0.03 | 0.17 | 0.00 | 0.00 | 98              | 14.7                                |
| Alcyoniidae sp.1                | 0.04                                                                | 0.00 | 0.00 | 0.00 | 0.00 | 4               | 1                                   |
| Alcyoniidae sp.2                | 0.01                                                                | 0.00 | 0.00 | 0.00 | 0.00 | 2               | 0.7                                 |
| Alcyoniidae sp.3                | 0.01                                                                | 0.00 | 0.00 | 0.00 | 0.00 | 5               | 0.7                                 |
| Alcyoniidae sp.4                | 0.02                                                                | 0.00 | 0.00 | 0.00 | 0.00 | 5               | 1.4                                 |
| Alcyoniidae sp.5                | 0.01                                                                | 0.00 | 0.00 | 0.00 | 0.00 | 6               | 1                                   |
| Alcyoniidae sp.6                | 0.01                                                                | 0.02 | 0.00 | 0.00 | 0.00 | 5               | 1.4                                 |
| Alcyoniidae sp.7                | 0.01                                                                | 0.01 | 0.00 | 0.00 | 0.00 | 5               | 1.4                                 |
| Anthomastus sp.1                | 0.01                                                                | 0.00 | 0.00 | 0.00 | 0.00 | 25              | 1                                   |
| <i>Anthoptilum grandiflorum</i> | 0.02                                                                | 1.21 | 0.00 | 0.00 | 0.00 | 79              | 12.7                                |
| Anthozoa sp.1                   | 0.04                                                                | 0.00 | 0.00 | 0.00 | 0.18 | 23              | 2.4                                 |
| Anthozoa sp.3                   | 0.01                                                                | 0.00 | 0.00 | 0.00 | 0.00 | 6               | 0.7                                 |
| Anthozoa sp.4                   | 0.06                                                                | 0.00 | 0.00 | 0.00 | 0.00 | 27              | 1                                   |
| Anthozoa sp.5                   | 0.00                                                                | 0.13 | 0.30 | 0.00 | 0.00 | 9               | 2.1                                 |
| Anthozoa sp.6                   | 0.07                                                                | 0.01 | 0.00 | 0.00 | 0.00 | 7               | 1.4                                 |
| <i>Astrotoma agassizii</i>      | 0.05                                                                | 0.00 | 0.00 | 0.00 | 0.00 | 22              | 2.4                                 |
| Attached Solitary CupCoral      | 0.26                                                                | 0.03 | 0.00 | 0.00 | 0.00 | 154             | 8.6                                 |
| <i>Bathelia candida</i>         | 0.28                                                                | 0.00 | 0.00 | 0.00 | 0.00 | 131             | 11.3                                |
| Brachiopoda sp.1                | 0.08                                                                | 0.00 | 0.00 | 0.00 | 0.00 | 82              | 3.8                                 |
| <i>Brucerolis</i> sp.1          | 0.18                                                                | 0.17 | 0.11 | 0.00 | 0.00 | 50              | 9.9                                 |
| Bryozoa sp.1                    | 0.08                                                                | 0.00 | 0.00 | 0.00 | 0.00 | 11              | 2.4                                 |
| Bryozoa sp.10                   | 0.01                                                                | 0.00 | 0.00 | 0.00 | 0.00 | 6               | 1                                   |
| Bryozoa sp.11                   | 0.12                                                                | 0.00 | 0.00 | 0.00 | 0.00 | 35              | 4.8                                 |
| Bryozoa sp.13                   | 0.21                                                                | 0.00 | 0.00 | 0.00 | 0.00 | 17              | 2.4                                 |
| Bryozoa sp.14                   | 0.02                                                                | 0.00 | 0.00 | 0.00 | 0.00 | 4               | 0.7                                 |
| Bryozoa sp.15                   | 0.01                                                                | 0.00 | 0.00 | 0.00 | 0.00 | 3               | 0.7                                 |
| Bryozoa sp.16                   | 0.01                                                                | 0.00 | 0.00 | 0.00 | 0.00 | 6               | 0.7                                 |
| Bryozoa sp.18                   | 0.09                                                                | 0.00 | 0.00 | 0.00 | 0.00 | 6               | 1.7                                 |
| Bryozoa sp.2                    | 0.78                                                                | 0.02 | 0.00 | 0.00 | 0.21 | 104             | 13.4                                |
| Bryozoa sp.3                    | 0.16                                                                | 0.00 | 0.00 | 0.00 | 0.00 | 24              | 4.8                                 |
| Bryozoa sp.4                    | 0.10                                                                | 0.00 | 0.00 | 0.00 | 0.00 | 83              | 2.4                                 |
| Bryozoa sp.5                    | 0.20                                                                | 0.00 | 0.00 | 0.00 | 0.00 | 70              | 5.1                                 |
| Bryozoa sp.6                    | 0.41                                                                | 0.01 | 0.00 | 0.00 | 0.00 | 141             | 15.8                                |
| Bryozoa sp.9                    | 0.26                                                                | 0.00 | 0.00 | 0.00 | 0.00 | 18              | 3.1                                 |
| Bryozoa spp                     | 0.24                                                                | 0.05 | 0.00 | 0.00 | 0.00 | 53              | 8.9                                 |
| Caridea sp.1                    | 0.14                                                                | 0.01 | 1.78 | 0.00 | 0.00 | 33              | 6.2                                 |
| Caridea sp.2                    | 0.01                                                                | 0.01 | 0.00 | 0.00 | 0.00 | 5               | 1.4                                 |
| Caridea sp.3                    | 0.03                                                                | 0.01 | 0.12 | 0.00 | 0.00 | 16              | 2.7                                 |

|                             |      |      |      |       |      |     |      |
|-----------------------------|------|------|------|-------|------|-----|------|
| Ceriantharia spp            | 0.01 | 0.02 | 0.00 | 0.00  | 0.00 | 12  | 1    |
| Cerianthidae sp.1           | 0.02 | 0.20 | 0.11 | 0.00  | 0.00 | 35  | 6.5  |
| Cerianthidae sp.2           | 0.15 | 0.08 | 0.00 | 0.00  | 0.00 | 24  | 5.8  |
| Cerianthidae sp.3           | 0.12 | 0.00 | 0.00 | 0.00  | 0.18 | 11  | 3.1  |
| Cerianthidae sp.6           | 0.03 | 0.06 | 0.00 | 0.00  | 0.00 | 8   | 2.1  |
| Cidaroida sp.1              | 0.03 | 0.00 | 0.00 | 0.00  | 0.00 | 20  | 2.7  |
| Cirripectida sp.2           | 0.00 | 0.01 | 0.00 | 0.00  | 0.00 | 2   | 0.7  |
| Cnidaria sp.2               | 0.02 | 0.00 | 0.00 | 0.00  | 0.00 | 3   | 1    |
| Cnidaria sp.4               | 0.04 | 0.00 | 0.00 | 0.00  | 0.00 | 17  | 3.4  |
| Cnidaria spp                | 0.07 | 0.02 | 0.53 | 0.00  | 0.00 | 36  | 4.5  |
| Crinoidea sp.1              | 0.02 | 0.00 | 0.00 | 0.00  | 0.00 | 7   | 1.4  |
| CWC_Whip                    | 0.06 | 0.12 | 0.18 | 0.00  | 1.03 | 54  | 6.8  |
| Demospongiae sp.10          | 0.78 | 0.01 | 0.00 | 0.50  | 0.00 | 121 | 17.8 |
| Demospongiae sp.18          | 0.03 | 0.00 | 0.00 | 0.00  | 0.00 | 11  | 0.7  |
| Demospongiae sp.2           | 0.09 | 0.00 | 0.00 | 0.00  | 0.00 | 14  | 3.4  |
| Demospongiae sp.7           | 0.06 | 0.04 | 0.00 | 0.00  | 0.00 | 8   | 2.4  |
| <i>Flabellum apertum</i>    | 0.00 | 0.13 | 0.00 | 0.00  | 0.00 | 14  | 3.1  |
| <i>Flabellum</i> sp         | 0.00 | 0.20 | 4.70 | 0.00  | 0.00 | 62  | 4.5  |
| <i>Funiculina</i> sp.1      | 0.00 | 0.18 | 0.00 | 0.00  | 0.00 | 6   | 1.7  |
| Gastropoda sp.1             | 0.01 | 0.00 | 0.00 | 0.00  | 0.21 | 3   | 1    |
| Gastropoda sp.2             | 0.08 | 0.90 | 0.21 | 0.00  | 0.00 | 67  | 13.4 |
| Gastropoda sp.3             | 0.01 | 0.00 | 0.00 | 0.00  | 0.00 | 3   | 0.7  |
| Gastropoda sp.5             | 0.02 | 0.01 | 0.00 | 0.00  | 0.00 | 4   | 1.4  |
| Hexactinellida sp.13        | 0.43 | 0.03 | 0.11 | 0.00  | 0.00 | 45  | 8.9  |
| Hexactinellida sp.2         | 0.72 | 0.00 | 0.00 | 0.00  | 0.00 | 65  | 9.2  |
| Hexactinellida sp.5         | 0.01 | 0.00 | 0.00 | 0.00  | 0.00 | 2   | 0.7  |
| Hexactinellida sp.6         | 0.03 | 0.00 | 0.00 | 0.00  | 0.00 | 4   | 1.4  |
| Hexactinellida sp.7         | 0.02 | 0.00 | 0.00 | 0.00  | 0.00 | 2   | 0.7  |
| Hexactinellida sp.8         | 0.13 | 0.00 | 0.00 | 0.00  | 0.00 | 8   | 1.7  |
| Hormathiidae sp.1.          | 0.00 | 0.03 | 0.00 | 0.00  | 0.00 | 5   | 1.7  |
| Hormathiidae sp.2           | 0.00 | 0.00 | 0.00 | 12.72 | 0.00 | 47  | 0.7  |
| Hydrozoa spp                | 0.29 | 0.02 | 0.00 | 0.00  | 0.00 | 18  | 2.7  |
| Hydrozoa sp.1.              | 0.05 | 0.05 | 0.00 | 0.00  | 0.00 | 26  | 3.8  |
| Hydrozoa sp.2               | 0.05 | 0.00 | 0.00 | 0.00  | 0.00 | 4   | 0.7  |
| Hydrozoa sp.3               | 0.01 | 0.06 | 0.00 | 0.00  | 0.00 | 3   | 0.7  |
| Hydrozoa sp.6               | 0.12 | 0.00 | 0.00 | 0.00  | 0.00 | 4   | 1    |
| Isididae sp                 | 0.04 | 0.00 | 0.00 | 0.00  | 0.00 | 7   | 1.7  |
| <i>Munida spinosa</i>       | 0.50 | 0.19 | 0.00 | 1.02  | 0.00 | 105 | 15.4 |
| <i>Neolithodes diomedae</i> | 0.00 | 0.11 | 0.00 | 0.00  | 0.00 | 4   | 1.4  |
| Onuphidae sp.1              | 0.01 | 0.03 | 0.74 | 0.00  | 0.00 | 3   | 1    |
| Ophiolepididae sp.1         | 0.00 | 0.13 | 2.22 | 0.00  | 0.00 | 9   | 2.1  |
| Ophiuroidea sp.1            | 0.11 | 0.00 | 0.00 | 0.00  | 0.00 | 8   | 1.4  |
| Ophiuroidea sp.2            | 0.03 | 0.00 | 0.00 | 0.00  | 0.00 | 3   | 0.7  |
| Ophiuroidea spp             | 0.27 | 0.20 | 0.00 | 0.00  | 0.00 | 39  | 7.9  |
| <i>Paralomis Formosa</i>    | 0.01 | 0.00 | 0.00 | 0.00  | 0.00 | 2   | 0.7  |
| Pennatulacea sp             | 0.06 | 0.86 | 0.00 | 0.00  | 0.00 | 31  | 6.5  |
| Pennatulacea sp.2           | 0.00 | 0.41 | 0.00 | 0.00  | 0.00 | 37  | 2.4  |
| Pennatulacea sp.3           | 0.00 | 0.41 | 0.00 | 0.00  | 0.00 | 13  | 1    |
| Pennatulacea sp.4           | 0.03 | 0.04 | 0.00 | 0.00  | 0.00 | 2   | 0.7  |
| Pennatulacea sp.5           | 0.02 | 0.01 | 0.00 | 0.00  | 0.00 | 5   | 1.4  |
| Pennatulacea sp.7           | 0.00 | 0.11 | 0.00 | 0.00  | 0.00 | 2   | 0.7  |
| <i>Phakellia</i> sp.1       | 0.02 | 0.00 | 0.00 | 0.00  | 0.00 | 35  | 1    |
| <i>Phelliactis</i> sp.1     | 0.00 | 0.20 | 0.00 | 0.00  | 0.00 | 7   | 1.7  |
| Polychaete spp              | 0.01 | 0.00 | 0.00 | 0.00  | 0.00 | 4   | 1    |
| Porifera sp.20              | 0.20 | 0.00 | 0.00 | 0.00  | 0.00 | 9   | 1.4  |
| Porifera sp.21              | 0.03 | 0.00 | 0.00 | 0.00  | 0.00 | 9   | 1    |
| Porifera sp.3               | 0.44 | 0.04 | 0.00 | 0.00  | 0.00 | 122 | 17.5 |
| Porifera sp.30              | 0.06 | 0.00 | 0.00 | 0.00  | 0.00 | 24  | 1.4  |
| Porifera sp.35              | 0.28 | 0.00 | 0.00 | 0.00  | 0.00 | 21  | 3.4  |
| Porifera sp.5               | 0.02 | 0.01 | 0.00 | 0.00  | 0.00 | 15  | 2.1  |

|                              |      |      |      |      |      |      |      |
|------------------------------|------|------|------|------|------|------|------|
| Porifera sp.7                | 0.02 | 0.00 | 0.00 | 0.00 | 0.00 | 3    | 1    |
| Porifera sp.8                | 0.01 | 0.00 | 0.00 | 0.00 | 0.00 | 2    | 0.7  |
| Porifera spp                 | 0.24 | 0.05 | 0.18 | 0.00 | 0.00 | 50   | 6.5  |
| Porifera_Encrusting_Sponge   | 1.44 | 0.00 | 0.00 | 0.00 | 0.00 | 176  | 20.9 |
| Porifera_Erect               | 0.13 | 0.02 | 0.00 | 0.00 | 0.00 | 27   | 5.5  |
| Porifera_Erect_Laminar       | 0.00 | 0.10 | 0.00 | 0.00 | 0.00 | 9    | 1.7  |
| Porifera_Erect_Simple        | 0.06 | 0.01 | 0.00 | 0.00 | 0.00 | 19   | 2.4  |
| Porifera_Massive             | 1.27 | 0.07 | 0.00 | 0.00 | 0.00 | 203  | 22.6 |
| Porifera_Massive_Ball        | 1.61 | 0.05 | 0.06 | 0.00 | 0.00 | 267  | 28.1 |
| Primnoidea sp.1              | 0.01 | 0.00 | 0.00 | 0.00 | 0.00 | 18   | 1.4  |
| Primnoidea sp.2              | 0.01 | 0.00 | 0.00 | 0.00 | 0.00 | 13   | 1    |
| Primnoidea sp.3              | 0.01 | 0.06 | 0.00 | 0.00 | 0.00 | 5    | 1    |
| Primnoidea sp.4              | 0.03 | 0.00 | 0.00 | 0.00 | 0.00 | 16   | 1    |
| Primnoidea sp.9              | 0.01 | 0.03 | 0.00 | 0.00 | 0.00 | 9    | 1    |
| Primnoidea spp               | 0.05 | 0.12 | 0.00 | 0.00 | 0.00 | 19   | 3.1  |
| Pycnogonida spp              | 0.03 | 0.00 | 0.00 | 0.00 | 0.00 | 3    | 0.7  |
| Scleractinia sp.1            | 0.44 | 0.00 | 0.00 | 0.00 | 0.00 | 127  | 8.9  |
| Scleractinia sp.10           | 0.19 | 0.07 | 0.00 | 0.00 | 0.18 | 76   | 6.8  |
| Scleractinia sp.11           | 0.04 | 0.03 | 0.00 | 0.00 | 0.00 | 22   | 1.7  |
| Scleractinia sp.2            | 0.03 | 0.30 | 0.00 | 0.00 | 0.00 | 18   | 2.1  |
| Scleractinia sp.3            | 0.00 | 0.02 | 0.00 | 0.00 | 0.00 | 10   | 0.7  |
| Scleractinia sp.4            | 0.18 | 0.00 | 0.00 | 0.00 | 0.00 | 36   | 4.1  |
| Scleractinia sp.5            | 0.33 | 1.02 | 0.00 | 0.00 | 0.00 | 204  | 25.7 |
| Scleractinia sp.7            | 0.05 | 0.00 | 0.00 | 0.00 | 0.00 | 22   | 1.4  |
| Scleractinia sp.8            | 0.15 | 0.00 | 0.00 | 0.00 | 0.00 | 75   | 3.4  |
| Scleractinia sp.9            | 0.04 | 0.00 | 0.00 | 0.00 | 0.00 | 34   | 2.1  |
| Serpulidae sp.1              | 0.03 | 0.06 | 0.11 | 0.00 | 0.00 | 8    | 1.7  |
| Serpulidae sp.2              | 0.01 | 0.00 | 0.00 | 0.00 | 0.00 | 2    | 0.7  |
| Serpulidae sp.3              | 0.03 | 0.01 | 0.00 | 0.00 | 0.00 | 5    | 1    |
| <i>Stylaster densicaulis</i> | 0.21 | 0.06 | 0.00 | 0.00 | 0.00 | 97   | 7.9  |
| Stylasteridae sp             | 5.51 | 0.04 | 0.00 | 0.00 | 0.00 | 1166 | 56.2 |
| Stylasteridae sp.1           | 0.03 | 0.00 | 0.00 | 0.00 | 0.00 | 14   | 1.4  |
| Stylasteridae sp.10          | 0.01 | 0.00 | 0.00 | 0.00 | 0.00 | 2    | 0.7  |
| Stylasteridae sp.11          | 0.01 | 0.00 | 0.00 | 0.00 | 0.00 | 6    | 0.7  |
| Stylasteridae sp.2           | 1.52 | 0.00 | 0.00 | 0.00 | 0.00 | 151  | 19.2 |
| Stylasteridae sp.3           | 0.06 | 0.01 | 0.00 | 0.00 | 0.00 | 18   | 3.4  |
| Stylasteridae sp.4           | 0.35 | 0.00 | 0.00 | 0.00 | 0.00 | 32   | 6.8  |
| Stylasteridae sp.5           | 0.28 | 0.00 | 0.00 | 0.00 | 0.00 | 18   | 3.1  |
| Stylasteridae sp.6           | 0.04 | 0.00 | 0.00 | 0.00 | 0.00 | 8    | 1    |
| Stylasteridae sp.7           | 0.01 | 0.03 | 0.00 | 0.00 | 0.00 | 6    | 1.4  |
| Stylasteridae sp.9           | 0.02 | 0.00 | 0.00 | 0.00 | 0.00 | 8    | 0.7  |
| <i>Thouarella viridis</i>    | 0.82 | 0.00 | 0.00 | 0.00 | 0.00 | 102  | 5.8  |
| <i>Thymops birsteini</i>     | 0.02 | 0.00 | 0.00 | 0.00 | 0.00 | 19   | 1    |
| Unknown Species.3            | 0.29 | 0.00 | 0.00 | 0.00 | 0.00 | 30   | 1.7  |
| Vesicomidae sp.1             | 0.09 | 0.00 | 0.00 | 0.00 | 0.00 | 17   | 0.7  |

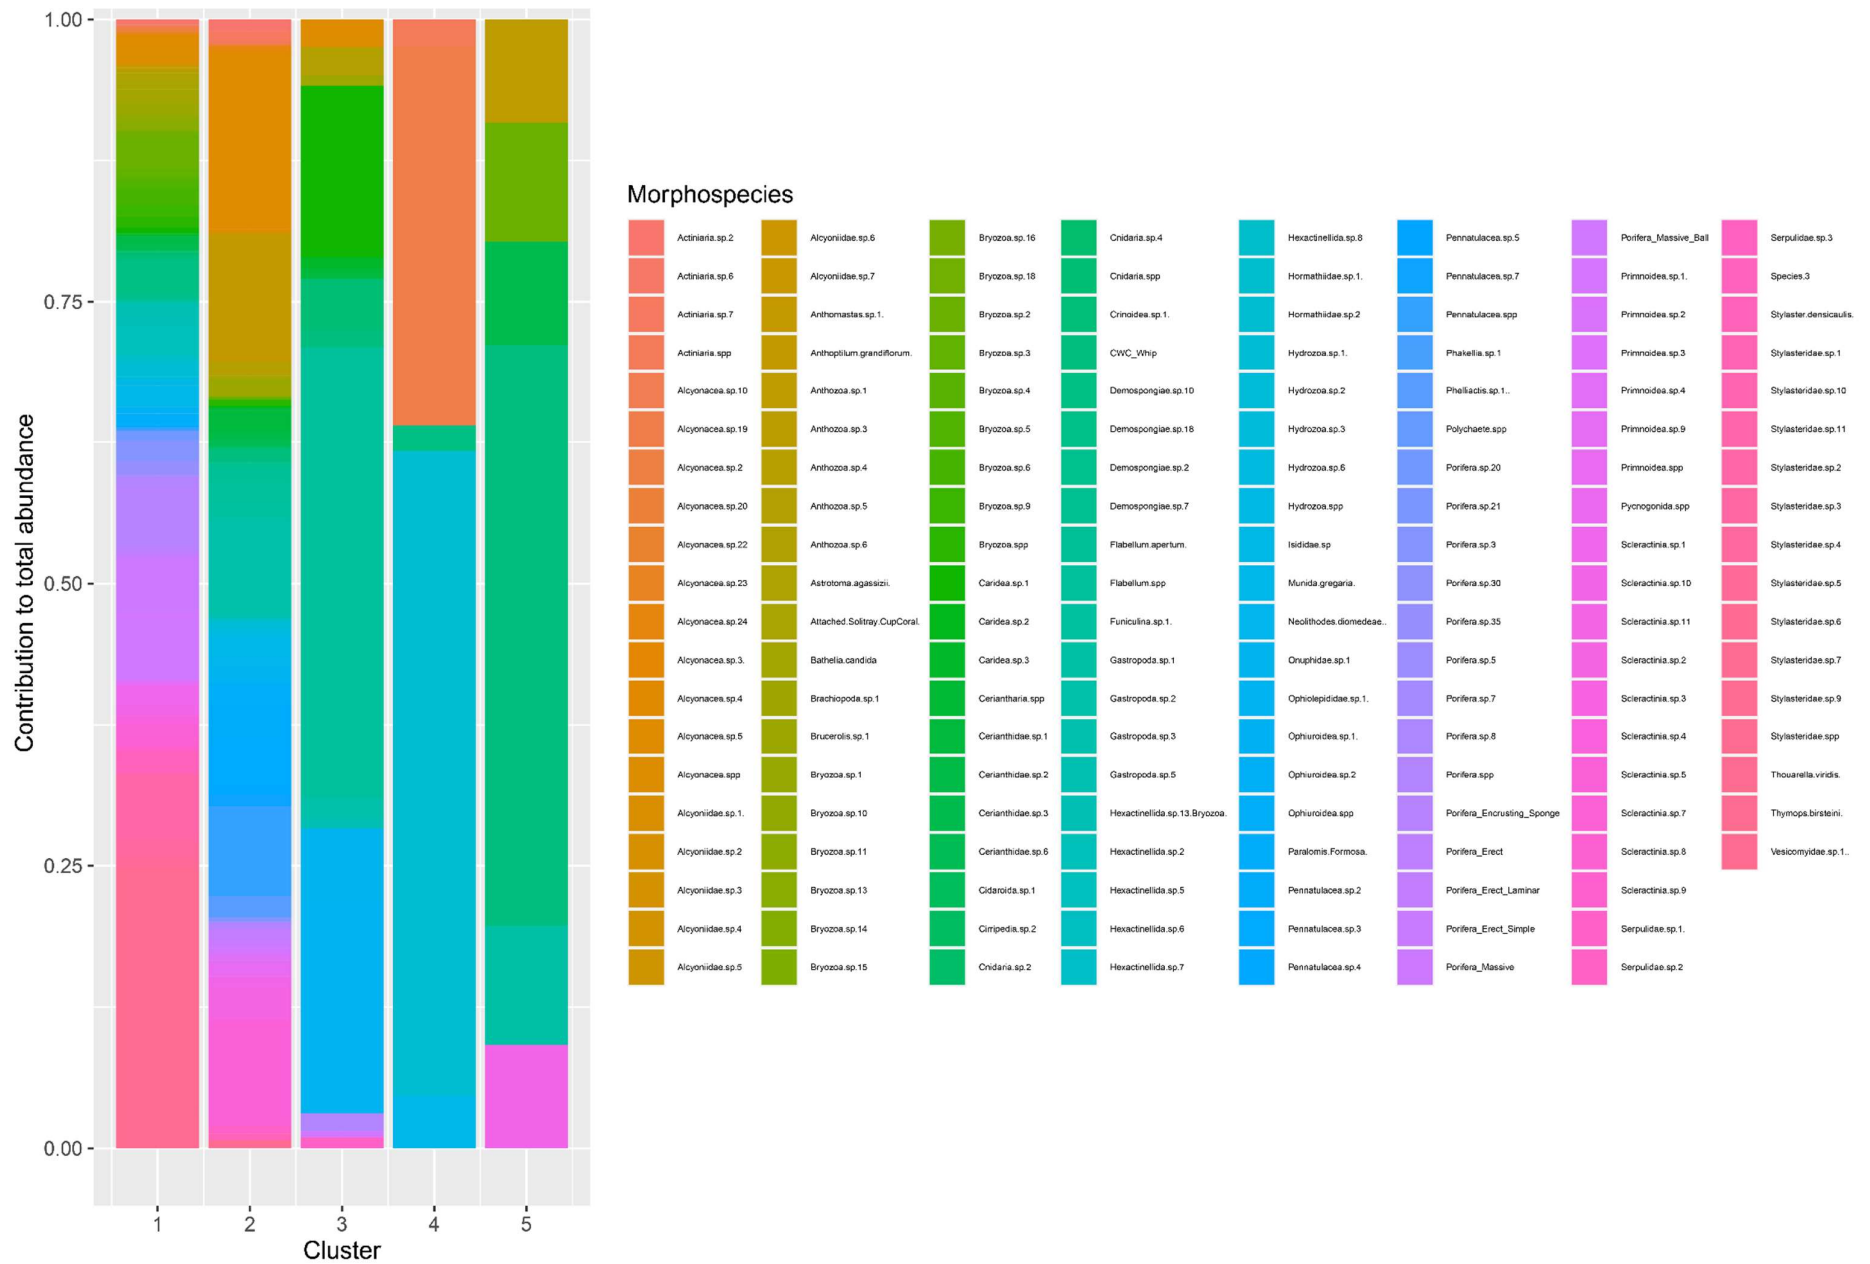

Figure S3. Contribution (percent of total) toward total abundance of morphospecies belonging to each of the five clusters after hierarchal cluster analysis.



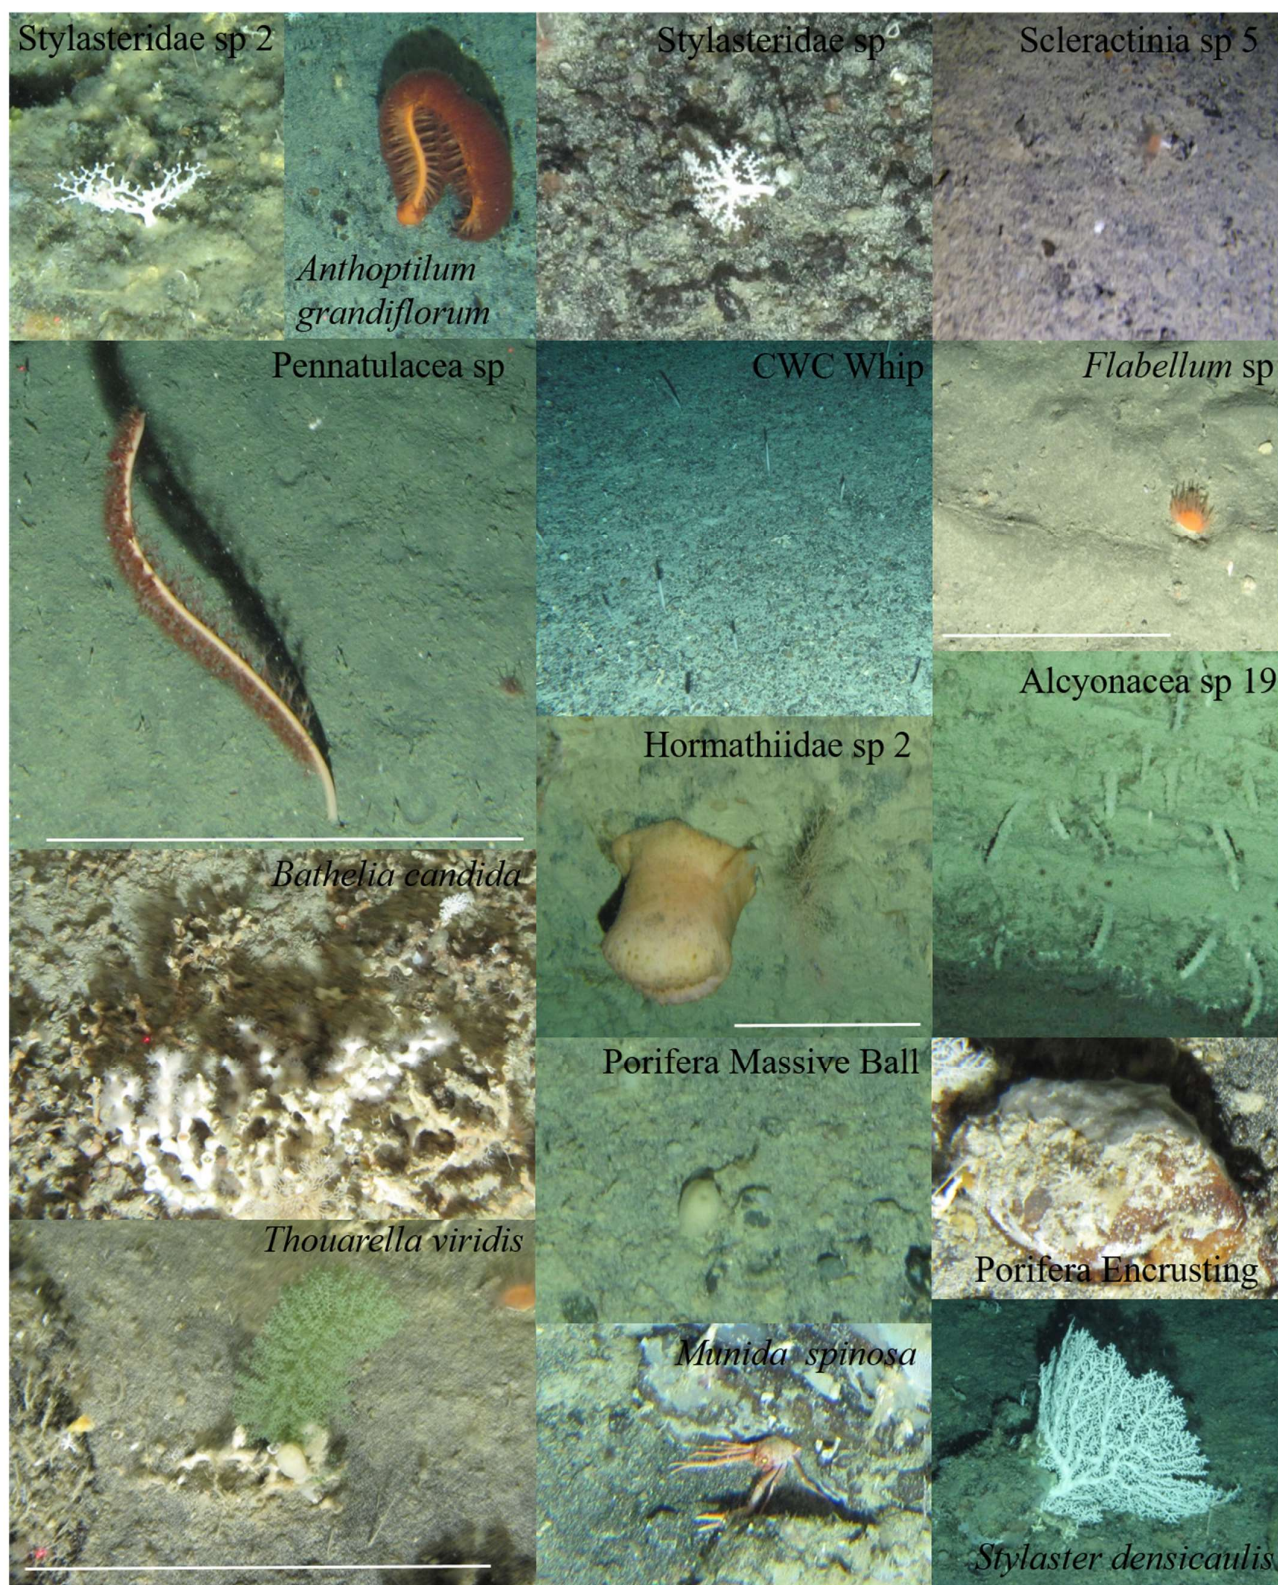

Figure S4. Examples of morphospecies that characterise epibenthic megafaunal assemblages in the Falkland Islands Conservation Zones. Scale bar = 30 cm.
